# Supplementary material for: Comparing the Impacts of Single- and Multi-Objective Optimization on the Parameter Estimation and Performance of a Land Surface Model
Source: Copernicus journal article supplement (doi:10.5194/hess-2024-121), 2024-05-30
Supplement: Supplementary file 1 [file hess-2024-121-supplement.pdf]

Supporting Information for

# **Single- and Multi-Objective Parameter Optimization of Common Land Model based on the revised sequential Monte Carlo algorithm**

Cong Xu<sup>1</sup>, Gaofeng Zhu<sup>1</sup>, Yang Zhang<sup>1</sup>, Kun Zhang<sup>2</sup>

<sup>1</sup>College of Earth and Environmental sciences, Lanzhou University, Lanzhou 730000, China

<sup>2</sup>School of Biological Sciences and Institute for Climate and Carbon Neutrality, the University of Hong Kong, Hong Kong SAR, China

*Corresponding author: Gaofeng Zhu (zhugf@lzu.edu.cn)*

## **Contents of this file**

S1: Evaluating the effectiveness and efficiency of the revised PEM-SMC algorithm

S2: The configuration of the tunable parameters

S3: The leaf stomatal photosynthesis-conductance module of CoLM

S4: Figure S6 to S9

## **S1 Evaluating the effectiveness and efficiency of the revised PEM-SMC algorithm**

Here, we conducted two case studies to compare the differences in optimization effectiveness and efficiency between the original PEM-SMC algorithm and its revised version.

### **S1.1 Case study 1: synthetic 5-dimensional bimodal normal distribution**

To emulate the common feature of the parameter surface with multiple modes in Land Surface Models (LSMs), the first case study involves a synthetic multi-dimensional bimodal normal distribution:

$$\pi(\theta) = \frac{1}{3}N_d(\theta; -\mathbf{5}, 1) + \frac{2}{3}N_d(\theta; \mathbf{5}, 1) \quad (1)$$

where  $\theta$  denotes a five-dimensional parameter vector, with each parameter constrained with a feasible range of -10 to 10. The values -5 and 5 correspond to the true parameter values at the two peaks of the distribution function. The 1 represents the covariance of the two normal distributions.

Regarding optimization efficiency, for the same number of particles ( $N_p=8000$ ) and evolutions ( $S=1000$ ), the original PEM-SMC algorithm required 87 seconds to run, whereas the modified PEM-SMC algorithm only took 53 seconds. This 40% reduction in run time is particularly significant for complex models with lengthy single-run times. In terms of optimization effectiveness, the enhanced PEM-SMC algorithm demonstrated no significant differences from the original in aspects such as particle diversity, evolutionary progression, and final particle distribution (Figure S1). When considering the optimized values of the five-dimensional parameters, both the improved and original PEM-SMC algorithms consistently achieved the posterior marginal distributions of the parameters, successfully identifying the true values for each parameter (Figure S2). Thus, the enhanced PEM-SMC algorithm substantially reduces run time while maintaining the original's optimization performance.

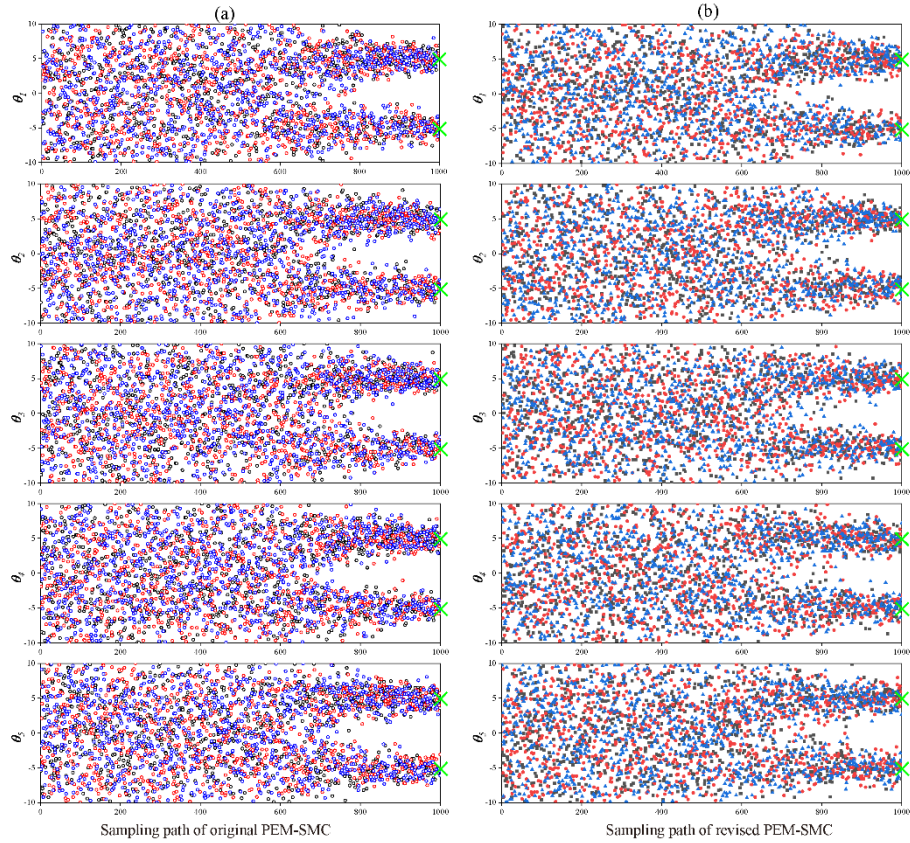

**Figure S1. Evolutionary of the parameter in three randomly selected particles along the sampling path toward a five-dimension bimodal posterior distribution using (a) original PEM-SMC and (b) revised PEM-SMC samplers. The true target parameter values, -5 and +5, are denoted by ‘x’ at the right hand side. Each particle is uniquely identified by distinct symbols and colors. Despite the graphical depiction being limited to three particles, the randomness inherent in particle selection suggests that the convergence patterns of additional particles would yield a similar profile to the one presented.**

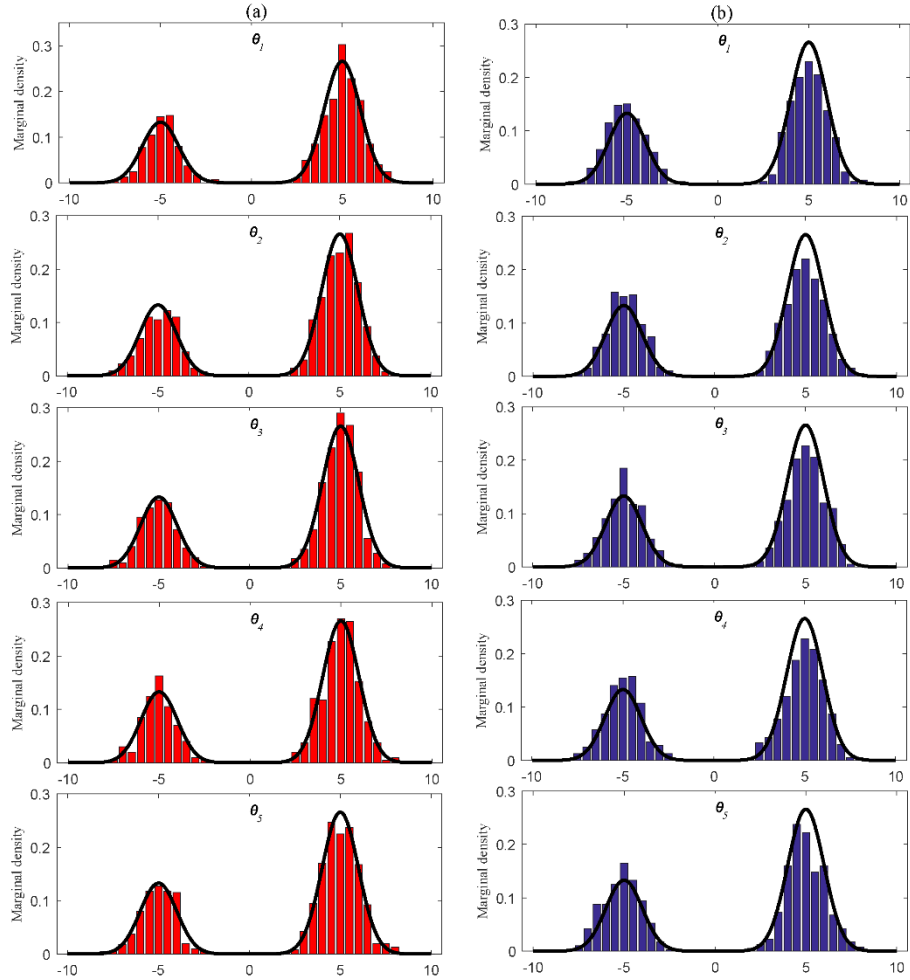

**Figure S2.** The posterior marginal distributions of the five-dimension parameters ( $\theta_1, \theta_2, \theta_3, \theta_4, \theta_5$ ) as generated by (a) original PEM-SMC and (b) revised PEM-SMC samplers. The solid black line depicts the target distribution.

### S1.2 Case study 2: a benchmark experiment

To ensure the accuracy of the subsequent optimization results, we performed a benchmark experiment on the PEM-SMC sampler algorithm. For each optimization scenario, we generated a simulated LE and NEE output dataset using the default values of the selected parameters and treated the simulated datasets as “observation datasets” to calibrate the selected parameters. By comparing the optimized values with the default values of the parameters, we can then determine whether the selected parameters and the PEM-SMC algorithm are adequate for the parameter calibration of CoLM. The particle sampling evolution results of selected parameters in three optimization scenarios are shown in Figure S3-S5. It is worth noting that although we have graphically displayed the evolution for only five particles, the randomness of particle selection guarantees that the graphical examination of the convergence of the algorithms for other particles would yield a similar picture. We can see that all the particles converge to a limiting distribution of the prior range at the last evolutionary iteration, and the median values of the posterior distributions of all parameters optimized by the PEM-SMC sampler match well with the actual parameter values in both single-objective and multi-

objective optimization scenarios. Therefore, we believe that the PEM-SMC algorithm is highly stable and robust in searching for the most appropriate model parameter combinations under the constraints of the observed datasets.

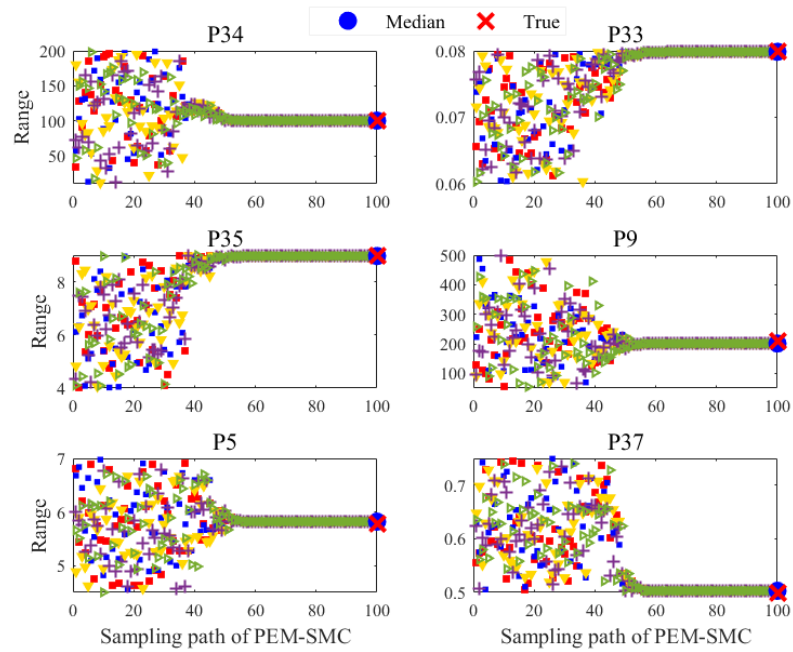

**Figure S3. Transitions of the sampled parameter values in five randomly selected particles during the sampling path in the optimization scenario of Opt\_ALL. The vertical axis denotes the prior range of the parameter and the horizontal axis denotes the number of evolutions. The cross symbol at the right-hand side of each plot indicates the actual parameter values and the solid circles are the median value of the posterior distribution of the parameters.**

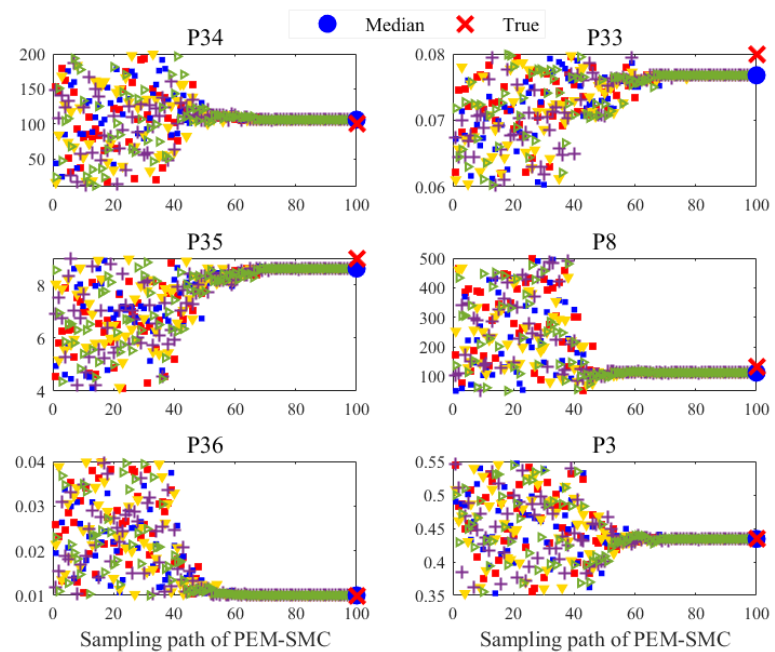

Figure S4. The same as in Figure S3 but for the selected parameters in the optimization scenario of Opt\_LE.

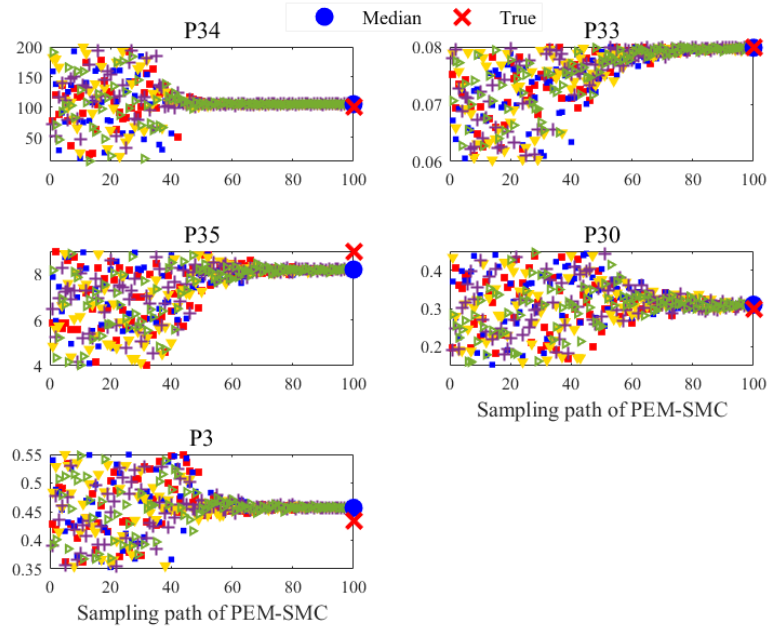

Figure S5. The same as in Figure S3 but for the selected parameters in the optimization scenario of Opt\_NEE.

## S2 The configuration of the tunable parameters

The forty chosen static parameters of the CoLM are delineated in Table S1, with their prior ranges determined as follows: For the parameters depending on the vegetation and soil type, such as the light reflection and transmission coefficients of the canopy (P20-P27), vegetation biochemical parameters (P19, P29, P31, P35, P36), and some soil physical parameters that empirically produced based on the soil texture characteristics (P2-P9), we defined the range as the lower and upper bounds among all the forest types in the 24-category(USGS) vegetation dataset and all the 17-category soil types, respectively. For some other parameters that cannot be calculated explicitly, we determined their ranges in the evergreen needleleaf forest ecosystem based on their physical meaning and commonly recognized conclusions. For example, the aerodynamic roughness length ( $Z_{0m}$ ) is empirically estimated as being about 1/10 of the height of the roughness elements (Wallace et al., 2006). Therefore, we define the range of this parameter as 2-3 according to the approximate tree height (20-30m)of the needleleaf forest. In addition, the default value of the quantum efficiency of vegetation photosynthesis(“effcon”) is 0.08 in all forest ecosystems. To make it variable and have basic biochemical significance, we set its range to 0.06-0.08 according to Landsberg et al, (2011). For some parameters that are defined as constants (P28, P30, P32), we add and subtract half of their values based on the original values as their variable ranges.

Table S1. Adjustable parameters for sensitivity analysis and optimization in CoLM.

| Para. | Parameter | Physical meaning | Category | Min | Max |
|-------|-----------|------------------|----------|-----|-----|
|-------|-----------|------------------|----------|-----|-----|

|     |                         |                                                      |        |        |        |
|-----|-------------------------|------------------------------------------------------|--------|--------|--------|
| P1  | $z_{\text{Ind}}$        | roughness length for soil surface                    | soil   | 0.005  | 0.015  |
| P2  | $\theta_{\text{sat-s}}$ | surface soil porosity                                | soil   | 0.35   | 0.55   |
| P3  | $\theta_{\text{sat-d}}$ | deep soil porosity                                   | soil   | 0.35   | 0.55   |
| P4  | $B_s$                   | Clapp and Hornberger “b” parameter                   | soil   | 4.5    | 7      |
| P5  | $B_d$                   | Clapp and Hornberger “b” parameter                   | soil   | 4.5    | 7      |
| P6  | $K_{\text{sat-s}}$      | saturated hydraulic conductivity of surface soil     | soil   | 0.001  | 0.176  |
| P7  | $K_{\text{sat-d}}$      | saturated hydraulic conductivity of deep soil        | soil   | 0.001  | 0.176  |
| P8  | $\psi_s$                | minimum soil suction of surface soil                 | soil   | 50     | 500    |
| P9  | $\psi_d$                | minimum soil suction of deep soil                    | soil   | 50     | 500    |
| P10 | wtfact                  | fraction of shallow groundwater area                 | soil   | 0.15   | 0.45   |
| P11 | wimp                    | factor controlling whether water is impermeable      | soil   | 0.01   | 0.1    |
| P12 | pondmx                  | maximum ponding depth for soil surface               | soil   | 5      | 15     |
| P13 | csoilc                  | the drag coefficient for the soil under the canopy   | soil   | 0.002  | 0.006  |
| P14 | zsno                    | roughness length for snow                            | snow   | 0.0012 | 0.0036 |
| P15 | capr                    | tuning factor of soil surface temperature            | soil   | 0.17   | 0.51   |
| P16 | cnfac                   | Crank Nicholson factor                               | canopy | 0.25   | 0.5    |
| P17 | dewmx                   | maximum ponding of leaf area                         | canopy | 0.05   | 0.15   |
| P18 | $Z_{0m}$                | aerodynamic roughness length                         | canopy | 2      | 3      |
| P19 | $\chi_L$                | leaf-angle distribution factor                       | canopy | 0.01   | 0.25   |
| P20 | $\alpha_{V,l}$          | leaf reflectance, visible, live                      | canopy | 0.07   | 0.1    |
| P21 | $\alpha_{V,d}$          | leaf reflectance, visible, dead                      | canopy | 0.16   | 0.36   |
| P22 | $\alpha_{N,l}$          | leaf reflectance, near IR, live                      | canopy | 0.35   | 0.45   |
| P23 | $\alpha_{N,d}$          | leaf reflectance, near IR, dead                      | canopy | 0.39   | 0.58   |
| P24 | $\delta_{V,l}$          | leaf transmittance, visible, live                    | canopy | 0.05   | 0.07   |
| P25 | $\delta_{V,d}$          | leaf transmittance, visible, dead                    | canopy | 0.001  | 0.3    |
| P26 | $\delta_{N,l}$          | leaf transmittance, near IR, live                    | canopy | 0.1    | 0.25   |
| P27 | $\delta_{N,d}$          | leaf transmittance, near IR, dead                    | canopy | 0.001  | 0.38   |
| P28 | slti                    | slope of low-temperature inhibition function         | canopy | 0.1    | 0.3    |
| P29 | hlti                    | 1/2 point of low-temperature inhibition function     | canopy | 278    | 288    |
| P30 | shti                    | slope of high-temperature inhibition function        | canopy | 0.15   | 0.45   |
| P31 | hhti                    | 1/2 point of high-temperature inhibition function    | canopy | 303    | 313    |
| P32 | sqrtdi                  | the inverse of the square root of the leaf dimension | canopy | 2.5    | 7.5    |
| P33 | $\alpha$                | quantum efficiency of vegetation photosynthesis      | canopy | 0.06   | 0.08   |
| P34 | $V_{\text{max}25}$      | maximum carboxylation rate 25°C                      | canopy | 10     | 200    |
| P35 | $m$                     | the slope of the conductance-photosynthesis model    | canopy | 4      | 9      |
| P36 | $b$                     | intercept of conductance-photosynthesis model        | canopy | 0.01   | 0.04   |
| P37 | $N$                     | coefficient of leaf nitrogen allocation              | canopy | 0.5    | 0.75   |
| P38 | smpmax                  | wilting point potential                              | canopy | -2e5   | -1e5   |
| P39 | smpmin                  | restriction for min of soil potential                | soil   | -1e8   | -9e7   |
| P40 | $E_{\text{trmax}}$      | maximum transpiration for vegetation                 | canopy | 1e-4   | 100e-4 |

### S3 The leaf stomatal photosynthesis-conductance module of CoLM

In CoLM, leaf stomatal resistance is coupled to leaf photosynthesis in a manner way:

$$\frac{1}{r_s} = m \frac{A e_s}{c_s e_i} p_s + b \quad (2)$$

where  $r_s$  is leaf stomatal resistance;  $m(P35)$  and  $b(P36)$  are the slope and intercept of the linear regression equation, respectively;  $c_s$  and  $e_s$  are the CO<sub>2</sub> concentration and vapor pressure at the leaf surface, respectively;  $e_i$  is saturation vapor pressure inside the leaf;  $p_s$  is atmospheric pressure at the surface;  $A$  is the leaf photosynthesis and is calculated by:

$$A = \min(w_c, w_j, w_e) \quad (3)$$

$$w_c = \frac{(c_i - \Gamma_*) V_{\max 25}}{c_i + K_c(1 + o_i/K_o)} \quad (4)$$

$$w_j = \frac{(c_i - \Gamma_*) 4.6 \phi \alpha}{c_i + 2\Gamma_*} \quad (5)$$

$$w_e = 0.5 V_{\max} \quad (6)$$

where  $w_c$  and  $w_j$  are the Rubisco and light limited rate of carboxylation, respectively;  $c_i$  and  $o_i$  are CO<sub>2</sub> and O<sub>2</sub> concentration, respectively;  $K_c$  and  $K_o$  are Michaelis-Menten constants for CO<sub>2</sub> and O<sub>2</sub>, respectively;  $\Gamma_*$  is the CO<sub>2</sub> compensation point;  $\alpha(P33)$  is the quantum efficiency;  $\phi$  is the absorbed photosynthetically active radiation;  $V_{\max}$  is the maximum rate of carboxylation varies with temperature, foliage nitrogen, and soil water:

$$V_{\max} = V_{\max 25} a_{v_{\max}}^{\frac{T_v - 25}{10}} f(N) f(T_v) f(w) \quad (7)$$

where  $V_{\max 25}(P34)$  is the maximum rate of carboxylation at 25 °C;  $a_{v_{\max}}$  is a temperature sensitivity parameter;  $f(N)$ ,  $f(T_v)$ , and  $f(w)$  are the limitations of foliage nitrogen, temperature, and soil water, respectively.

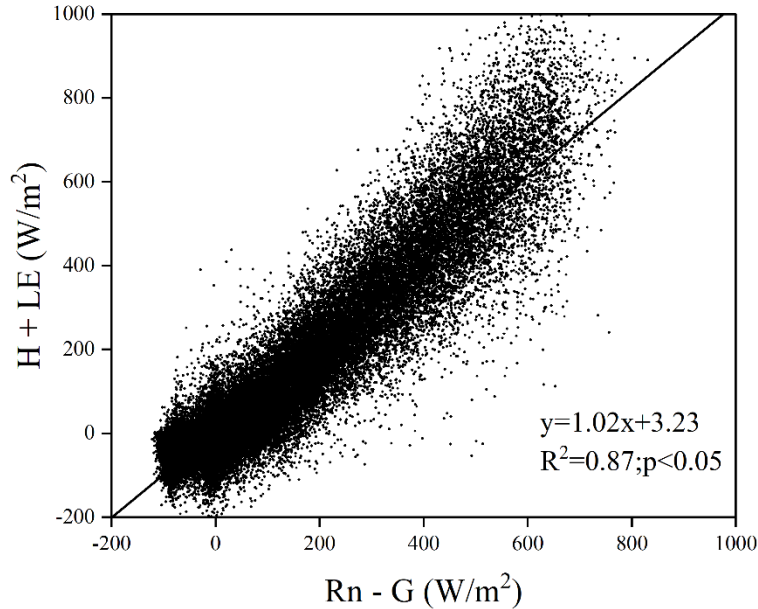

**Figure S6. The multi-year(2015-2020) energy balance closure of flux observation in the study site. Note that the results above are obtained after eliminating moments with missing or invalid values for net radiation, sensible heat flux, latent heat flux, and soil heat flux observations.**



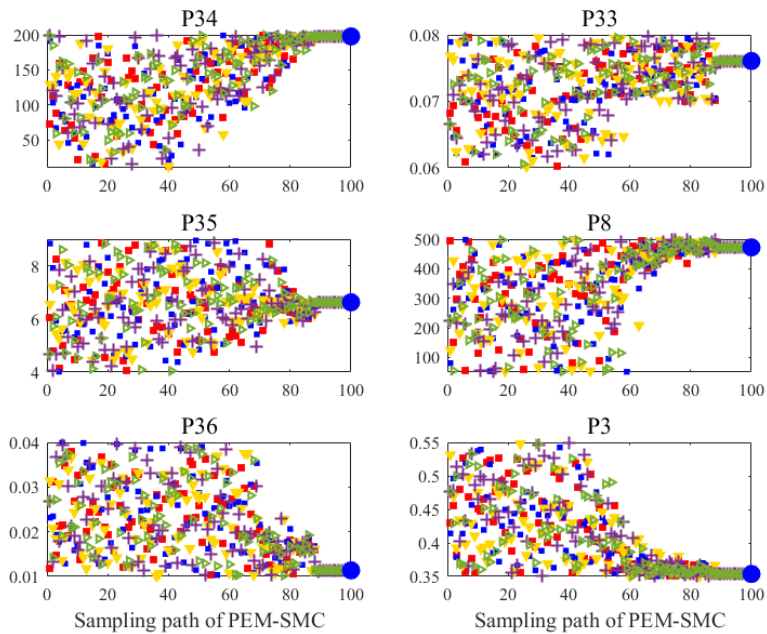

**Figure S7.** Transitions of the sampled parameter values in five randomly selected particles during the sampling path in the optimization scenario of Opt\_LE. The vertical axis denotes the prior range of the parameter and the horizontal axis denotes the number of evolutions. The solid circles are the median value of all particles at the end of evolutions.

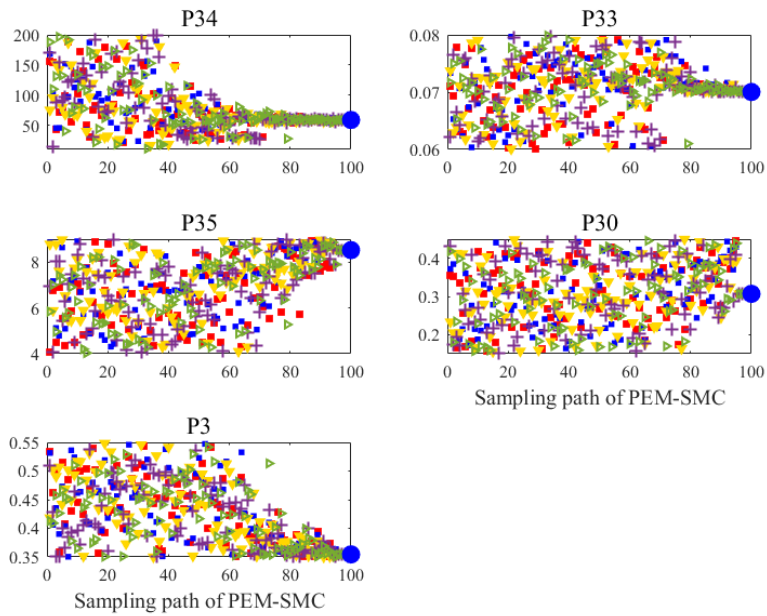

**Figure S8.** The same as in Fig. S7 but for the optimization scenario of Opt\_NEE.

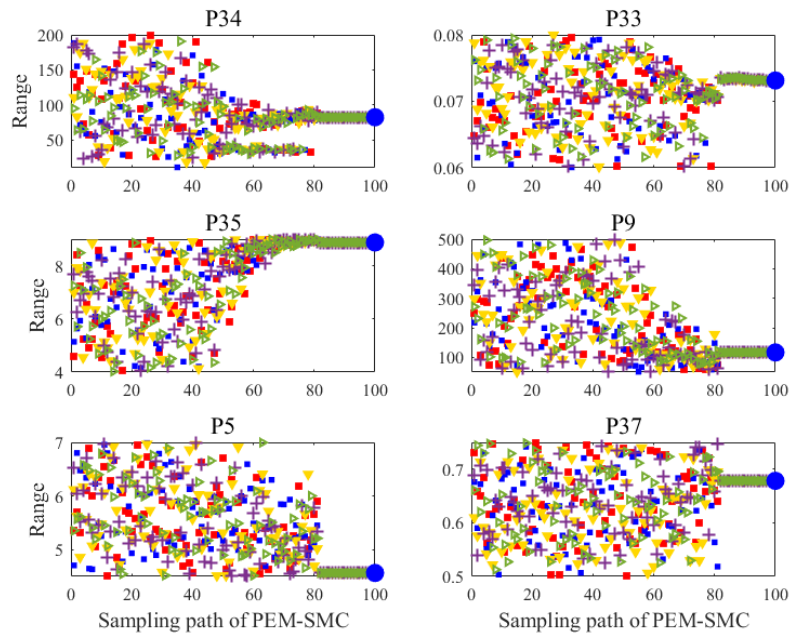

**Figure S9** The same as in Fig. S7 but for the optimization scenario of Opt\_ALL.
