# Supplementary material for: Comparing the Impacts of Single- and Multi-Objective Optimization on the Parameter Estimation and Performance of a Land Surface Model
Source: Copernicus journal article supplement (doi:10.5194/hess-2024-121), 2024-05-30
Supplement: Supplementary file [file hess-2024-121-AC3-supplement.pdf]

**Summary:** In this study, the authors applied a revised particle evolution Metropolis sequential Monte Carlo called PEM-SMC to single- and multi-objective optimization of the Common Land Model (CoLM) using measurements of the latent heat flux (LE) and net ecosystem exchange (NEE) from a typical evergreen needle-leaf forest observation site. The authors conclude that the revised PEM-SMC algorithm is a robust method for LE and NEE exhibit a trade-off, necessitating the estimation of these parameters against LE and NEE data simultaneously.

**Evaluation:** This paper is about an important topic in hydrologic modeling, namely the training of a land surface model so that its simulated output matches as closely and consistently as possible multiple different measurement types. Overall, the paper is reasonably well written, albeit at times using incorrect methodological terminology and language. I worked quite a bit on Bayesian methods and am always interested in the application of these methods to Earth-systems. I am not particularly excited and convinced by the work presented in this paper. I will summarize my comments next. Based on these comments, I recommended a major revision. This gives the authors an opportunity to revise their work. This may involve quite a bit of additional work as my comments will point out.

**Response:**

Thank you for taking the time to evaluate our work and for providing valuable feedback. We appreciate your recognition of the significance of our research topic in hydrologic modeling, as well as your expertise in Bayesian methods, which will be instrumental in enhancing our paper. We acknowledge that certain aspects of the manuscript, particularly with regard to methodological terminology and the application of Bayesian approaches, may require clarification. We are fully committed to addressing each of your concerns in detail. While we understand that the revisions may require considerable effort, we are prepared to undertake the necessary work to strengthen the manuscript and ensure its scientific rigor. We are grateful for the opportunity to submit a major revision and look forward to enhancing the quality and impact of our study based on your insightful comments.

**General Comments:**

While reading this manuscript, many thoughts went through my mind. In the first place, it was a trip down memory lane. The presented material reminded me of work done by Luis Bastidas and others about 3 decades ago, and my own work of about 15 years ago. Then, I was surprised to see that the authors do not reference much prior work and present the algorithm as if they invented all this themselves. Furthermore, the authors implemented a Bayesian approach, but they do not verify at all whether the assumptions they made were actually met in practice nor do they take advantage of their posterior distribution in analyzing model performance. Last but not least, I am not convinced yet that the mutation operator of their PEM-SMC algorithm (which is a crossover step!) leaves the target distribution invariant. I will now address each of these points in more detail. Before I do so, I must apologize for the fact that I heavily advertise my own work in my review below. In general, I do not like doing this, but this proved difficult in the present case. The authors' paper demonstrates a keen interest in methodology. This methodology has various problems and shortcomings. To point this out, I must unfortunately refer to our own published works. The authors work with MATLAB, so it should be easy to evaluate/test my suggestions and test their method against "state-of-the-art" methods in MATLAB I am pointing at. I hope my comments below clarify my concerns.

**Comment #1:** The conclusion that Land-surface models exhibit a trade-off in describing different data types has been well-known to the community. In a series of papers in the 1990s Bastidas and co-authors have convincingly shown that LSM training results in different "optimal" parameter values if trained against different data types. They used a multi-objective optimization framework for this, along with a multi-objective sensitivity analysis method to rank the relative importance of individual parameters in describing different data types. This problem did not resolve with the use of a more complex LSM but is a result of (among others) epistemic uncertainty (model structure errors) and measurement errors of the controlling variables (exogenous variables). This paper uses a Bayesian procedure and arrives at the same conclusions of Bastidas et al.

Thus, fundamentally, the conclusion of the authors is not new. Then, let me look at the

methodology used. Does this warrant publication in HESS? Before I move on to the methodology, I would want to clarify that the wording “multiple objective” is erroneous. In essence, the authors are lumping together in their likelihood function two different data streams. They do this by multiplying the likelihoods of LE and NEE. This is not multi-objective, as the authors only have 1 likelihood (= combined likelihood of NEE and LE). With the choice a Gaussian likelihood, the authors’s method is equivalent to weighted least squares. With a diagonal measurement error covariance matrix where the first n entries are the measurement error variances for the latent heat flux data and the next m entries are for the measurement error variances for the NEE data, you will arrive at exactly the same maximum a-posteriori (MAP) density solution [uniform prior is used]. What the authors did is maximum likelihood estimation with a weighted likelihood function.

**Response:**

The objective of this paper is not to restate the well-established conclusion regarding the importance of considering multiple target variables in the calibration of complex land surface models (LSMs). Rather, we aim to introduce a systematic framework for quantifying parameter uncertainty by integrating sensitivity analysis with the PEM-SMC algorithm and to validate its effectiveness in calibrating multiple complex process variables within LSMs. Additionally, this study provides concrete case support and methodological guidance for the argument that accounting for multiple process/target variables is crucial for achieving reliable parameter calibration. In the revised introduction, we will further highlight the novelty of this framework and its significance in the context of model parameter calibration.

Thank you for your correction. We acknowledge that, from a terminologically precise perspective, our approach does not fall under the definition of multi-objective optimization. Multi-objective optimization typically involves the use of independent objective functions for each variable, with solutions balanced through a Pareto optimal solution set. In contrast, our approach combines LE and NEE data streams within a single likelihood function (i.e., a weighted likelihood), rather than using separate objective functions. Therefore, the term "multi-objective" is not accurate. In the revised

manuscript, we will consider replacing "multi-objective optimization" with terms such as "weighted composite multi-variable optimization," "multi-variable combined optimization," or "joint target variable optimization" to more precisely describe how the inclusion of both single and multiple target variables affects parameter calibration results and model effectiveness in LSMs.

**Comment #2:** The PEM-SMC algorithm the authors present & modify reminded me of my own work on particle-DREAM (Vrugt et al: Hydrology data assimilation using particle Markov chain Monte Carlo simulation: Theory, concept and applications), <http://dx.doi.org/10.1016/j.advwatres.2012.04.002>. Given the large overlap between the author's PEM-SMC method and particle-DREAM I was surprised to see that there is not a single reference in their methodological description to the particle-DREAM paper. It is possible that the authors missed this work, but then their so-called mutation step in Equation 18 is taken directly from the particle-DREAM paper, and /or related papers on DE-MC and the DREAM algorithm. The authors use the same symbols in their paper for the jump-rate,  $\gamma$ , parents,  $r_1$  and  $r_2$ , etc. as we used in our publications. The authors should properly cite and acknowledge past work.

**Response:**

Thank you for your valuable feedback. We sincerely apologize for the oversight in not citing the relevant literature on the Differential Evolution Adaptive Metropolis (DREAM) algorithm in this paper. In fact, in our team's earlier work where we introduced the PEM-SMC algorithm (Zhu et al. (2018): A new moving strategy for the sequential Monte Carlo approach in optimizing hydrological model parameters, <https://doi.org/10.1016/j.advwatres.2018.02.007>), we referenced four key papers related to the DREAM algorithm, fully acknowledging the contributions of previous research.

In this paper, our focus was primarily on improving the computational efficiency of the PEM-SMC algorithm and its application to land surface models (LSMs), which led to the unintentional omission of relevant citations in the algorithm description. We sincerely apologize for this. In the revised manuscript, we will include appropriate references to the DREAM and DE-MC algorithms and clearly explain how the PEM-

SMC algorithm builds upon and improves these earlier works.

Thank you again for pointing this out, and we appreciate your understanding.

### References:

Vrugt, J.A. , ter Braak, C.J.F. , Diks, C.G.H. , Schoups, G. , 2013. Hydrologic data assimilation using particle Markov chain Monte Carlo simulation: theory, concepts and applications. *Adv. Water Resour.* 51, 457–478.

Vrugt, J.A. , ter Braak, C.J.F. , Diks, C.G.H. , Higdon, D. , Robinson, B.A. , Hyman, J.M. , 2009. Accelerating Markov chain Monte Carlo simulation by differential evolution with self-adaptive randomized subspace sampling. *Int. J. Nonlinear Sci. Numer. Simul.* 10 (3), 273–290.

Vrugt, J.A., 2016. Markov chain Monte Carlo simulation using the DREAM software package: theory, concepts, and MATLAB implementation. *Environ. Modell. Softw.* 75, 273–316.

Vrugt, J.A., ter Braak, C.J.F., Clark, M.P., Hyman, J.M., Robinson, B.A., 2008. Treatment of input uncertainty in hydrologic modeling: doing hydrology backward with Markov chain Monte Carlo simulation. *Water Resour. Res.* 44, W00B09. <https://doi.org/10.1029/2007WR006720> .

Zhu, G., Li, X., Ma, J., Wang, Y., Liu, S., Huang, C., ... & Hu, X. (2018). A new moving strategy for the sequential Monte Carlo approach in optimizing the hydrological model parameters. *Advances in Water Resources*, 114, 164-179.

**Comment #2:** Fundamentally, I am not confident that the Metropolis acceptance probability defined after Equation (18) leaves the target distribution invariant. We struggled with this in the Particle-DREAM paper and presented in Appendix B (Page 476) a correct formulation of the acceptance probability so as to ensure ‘detail balance’. I suggest the authors study this Appendix and determine whether particle transitions guarantee an exact inference of the target distribution. This requires careful demonstration. As a side note, the PEM-SMC sampler has many elements in common with the ABC-Population Monte Carlo sampler used in Dadegeh and Vrugt, (2013: see Appendix A, Page 4845). We also implemented a DREAM resampling step in that algorithm.

**Response:**

Thank you for your insightful comments. In the appendix of our previous paper introducing the PEM-SMC algorithm (Zhu et al. (2018)), we have demonstrated that the algorithm maintains a detailed balance and that  $\pi_s(\cdot)$  is the unique stationary distribution at each intermediate stage. However, we fully recognize the critical importance of ensuring detailed balance to guarantee the invariance of the target distribution. Therefore, we will carefully review the appendix of the particle-DREAM paper you mentioned to ensure that the Metropolis acceptance probability in our PEM-SMC algorithm is correctly implemented and capable of accurately inferring the target distribution.

In the revised manuscript's appendix, we will provide detailed proof that the PEM algorithm maintains both detailed balance and the unique stationary distribution, while also citing your work to strengthen our argument.

**Comment #3:** In addition to my previous comment, even if the method is theoretically correct, then one cannot simply make a change to an algorithmic recipe and claim this revised method is robust ( as the authors do in their abstract). We cannot conclude anything about robustness using only the posterior distributions of the LE and NEE data. To inspire confidence in the revised algorithm one needs to demonstrate that the method works well on a large range of problems – meaning it converges to the known posterior distribution in a series of benchmark experiments. Otherwise, claims of robustness are meaningless, and we must simply trust that the algorithm correctly infers the target distribution of the LSM parameters.

**Response:**

Thank you for your valuable feedback. In the Supporting Information of the original manuscript, we validated the algorithm's performance on a synthetic multi-dimensional bimodal normal distribution and the known parameter distribution of the CoLM model. However, this may not be sufficient to demonstrate its robustness in handling more complex distributions. As you pointed out, to build confidence in the revised algorithm, we need to show its performance across a range of benchmark problems and ensure stable convergence to known posterior distributions. In the revised manuscript's

appendix, we will expand the benchmark experiments, drawing from the case studies in your previous work, "Markov chain Monte Carlo simulation using the DREAM software package: Theory, concepts, and MATLAB implementation," to further verify the convergence and robustness of the PEM-SMC algorithm.

**Comment #4:** Then, one more time about Equation (18), how is the resampling implemented? Are  $N$  candidate points generated simultaneously, and then pairwise the acceptance probability is computed to determine whether to accept the proposals or not. Or is the implementation sequential, that is, a proposal is created using Equation (18) and then is accepted (or not) with Metropolis probability  $\alpha$ . If accepted, the proposal replaces its parent, and then the next candidate point is created? The algorithmic recipe suggests this latter approach. The reason I ask this is that the first parallel implementation does not guarantee reversibility. This proof only holds for the latter, sequential, approach. See Appendix (PAGE 444-445) of Vrugt and TerBraak, <https://link.springer.com/article/10.1007/s11222-008-9104-9>.

**Response:**

In our algorithm, we adopt a sequential approach. Specifically, the mutation step (or what you may refer to as the crossover step) is performed by iterating through the  $N$  particles one by one. At each step, we randomly select two particles (excluding the current one) to carry out differential mutation and generate a candidate particle (Figure. R1). We then decide whether to accept the new particle based on the Metropolis acceptance probability. If accepted, the new particle replaces the current one.

In the process of generating other candidate particles, if the current particle is selected for differential mutation, we use the updated particle rather than the original one. Therefore, the entire process is sequential, rather than generating  $N$  candidate points simultaneously. This approach also aligns with the reversibility proof described by Vrugt and Ter Braak (pages 444-445), which applies specifically to sequential implementations.

We will carefully review the references you mentioned and further clarify this point in the revised manuscript to ensure our method properly maintains both reversibility and detailed balance.

```

% Mutation Operater
for k=1:Np

    parameter_median2=Generatep(parameter_new,k,bound(1,:),bound(2,:));
    alp_old=betas_new*target(parameter_new(k,:));
    alp_media=betas_new*target(parameter_median2);

    % M-H accept
    ratio=min([1,exp(alp_media-alp_old)]);
    u=rand;
    if u<ratio
        parameter_new(k,:)=parameter_median2;
        accept(stage,1)=accept(stage,1)+1;
    else
        parameter_new(k,:)=parameter_new(k,:);
    end
end
end

```

Figure. R1 The MATLAB code for the mutation operator.

**Comment #5:** How does the algorithm handle the parameter boundaries? What is done to a particle if it is sampled outside the prior parameter ranges (by the authors' mutation step)? Detailed balance requires that the proposals are assigned a zero likelihood, or better, the candidate points are folded [e.g. see Vrugt and Ter Braak, 2011: <https://doi.org/10.5194/hess-15-3701-2011>]. Which mechanism did the authors implement?

**Response:**

Thank you for your valuable feedback. In our current algorithm, we use a discard mechanism, meaning that when a new particle generated through differential evolution exceeds the prior parameter bounds, it is discarded, and other particles are randomly selected until one falls within the acceptable range. However, we recognize that this "discard" strategy may violate detailed balance. As you correctly pointed out, a more appropriate approach would be to assign zero likelihood to particles outside the bounds and reject them based on the acceptance probability, retaining the original particle. While this method preserves detailed balance, it may reduce sampling efficiency.

You also suggested an alternative approach, where particles exceeding the parameter bounds are "folded" back into the parameter space. This folding mechanism offers a promising solution, as it avoids discarding particles altogether, improves sampling efficiency, and maintains detailed balance.



In the revised manuscript, we will incorporate the folding mechanism into the candidate particle generation step to better balance detailed balance and sampling efficiency.

**Comment #6:** Then, on a related note, the authors do not address the question so as to why the machinery of a particle SMC method is required first of all to infer the posterior parameter distribution. I am most familiar with the DREAM algorithm as I developed this myself with Cajo Ter Braak (2008). I seriously question whether based on the listed algorithmic variables of  $S=100$  and  $N=200$  the SMC algorithm will succeed in generating samples of the target distribution. I hazard to predict that the DREAM algorithm (MATLAB toolbox:DREAM Package) will be computationally more efficient, in large part because the burn-in will be substantially smaller as one only needs to run  $N=3$  Markov chains. This does not require a tempering schedule to move particles from a prior to a posterior distribution. This type of bridge sampling only complicates methodology. Most people are familiar with the DREAM algorithm, and so why do we need new machinery if “old methods” can do the job – and as I bet more efficiently than what is presented in the present paper. Also, the multi-try variant of DREAM allows a further speed-up of the convergence speed to the target (posterior) distribution as the chains are evaluated in parallel and multiple proposals are created in each chain in parallel as well. The best proposal is then accepted with a modified Metropolis acceptance probability. This methodology is described in <https://doi.org/10.1029/2011WR010608>.

**Response:**

Thank you for your detailed feedback regarding the use of the SMC and DREAM algorithms. We would like to address and clarify your concerns as follows:

First, we acknowledge the effectiveness of the DREAM algorithm in sampling complex distributions, particularly its innovation in enhancing parameter space exploration through differential evolution. DREAM’s efficient chain mechanism significantly accelerates convergence, especially in multi-modal posterior distributions. However, we opted for the Sequential Monte Carlo (SMC) method due to its distinct advantages in handling complex, dynamic, and high-dimensional systems. As Land Surface Models (LSMs) become increasingly intricate, with more high-dimensional and nonlinear

parameters, their posterior distributions often exhibit multiple modes. Unlike MCMC-based methods, SMC can progressively fit intermediate distributions, such as geometric bridge distributions, allowing for greater flexibility in adapting to these complex posterior distributions, particularly in dynamic systems and time-series analyses. This makes SMC particularly suited to capturing both multi-modal and high-dimensional distributions.

While we recognize the efficiency of the DREAM algorithm—particularly its elimination of annealing schedules—as a strength in static models, the SMC algorithm’s particle diversity improvement mechanism, such as differential evolution, is also highly effective for exploring high-dimensional parameter spaces. This mechanism is conceptually similar to DREAM’s advanced differential evolution. Furthermore, the flexibility of SMC allows it to be extended over time and integrated with other methods, such as Dynamic Bayesian Networks, enhancing its suitability for time-varying systems.

In terms of computational efficiency, while DREAM’s parallel chain design reduces burn-in periods and accelerates convergence, we found that for complex, high-dimensional posterior distributions, SMC’s resampling and importance sampling steps enable quicker adaptation to the posterior distribution, particularly in multi-modal scenarios. To provide a more robust comparison of the two algorithms, we plan to include an additional experiment using the DREAM algorithm in the revised manuscript. This will further validate the performance of the PEM-SMC algorithm in fitting the target posterior distribution and allow us to compare the efficiency and accuracy of both approaches, offering a more comprehensive evaluation of their strengths and weaknesses.

**Comment #7:** The authors assume a normal likelihood for the residuals of the LSM model. Why did they choice a normal likelihood. This is the default choice but must be supported by evidence. This require a-posterior checking of the residuals of the time series of measured and simulated latent heat fluxes and NEE. I bet the residuals will exhibit autocorrelation, a nonconstant variance, and deviate from normality. This would disqualify the use of the normal likelihood function. Good statistical practice requires

the authors to evaluate that the assumptions about the likelihood function are met in practice. For example, consider Schoups and Vrugt, 2010. <https://doi.org/10.1029/2009WR008933>

**Response:**

Thank you for your valuable feedback and suggestions. After conducting a posterior analysis of the residuals for latent heat flux (LE) and net ecosystem exchange (NEE), we found that the residuals more closely follow a t-distribution rather than the initially assumed normal distribution (see Figure R2). While we initially selected the normal distribution due to its computational simplicity and widespread application, the heavy tails of the t-distribution make it more sensitive to extreme values, which may better suit our current dataset.

Despite the significant differences between the likelihood functions of the normal and t-distributions in handling extreme values, both produce consistent outcomes when determining whether to accept or reject candidate particles—i.e., for a given particle, the likelihood results are expected to be the same for both distributions. Therefore, we anticipate that this change in likelihood function will have minimal impact on the final optimization results. Nevertheless, to ensure model robustness, we will include a detailed report of the posterior analysis of residuals in the revised manuscript, adopt the t-distribution likelihood function, and compare its performance with the normal distribution to validate our assumption.

We also appreciate your reference to the work by Schoups and Vrugt (2010), and we plan to incorporate their methods, particularly in examining residual distributions and assessing model assumptions. This will help us ensure that the likelihood function is appropriate and well-suited to our data.

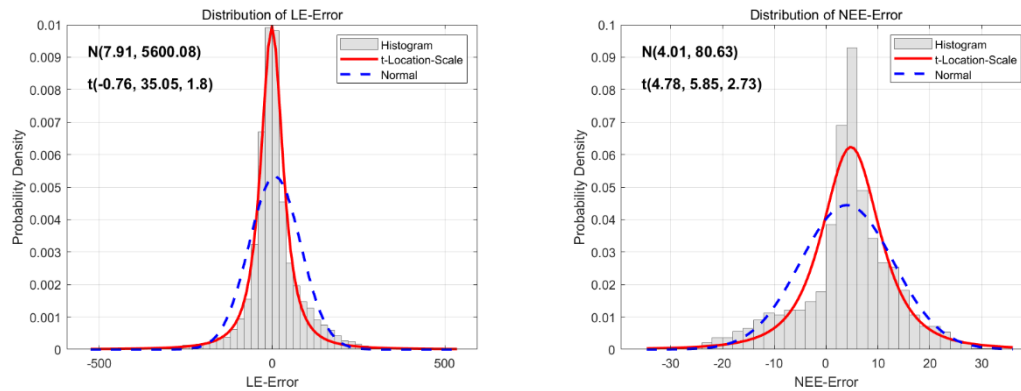

Figure R2 Comparison of the fitting performance between the normal distribution and t-distribution for the residuals of the LE and NEE target variables.

**Comment #8:** The authors multiply the likelihoods of the latent heat flux and NEE as if these two data types are independent. Is this a valid assumption? As an alternative, one could consider a composite likelihood, where the two likelihoods are additive – one can find applications of this in statistical literature, specifically in the application to spatial data. Then, this would constitute a novelty and justify publication in a highly rated journal such as HESS.

**Response:**

Thank you for your insightful feedback. In our initial parameter calibration, we assumed that latent heat flux (LE) and net ecosystem exchange (NEE) were independent variables, and therefore, we multiplied their likelihood functions. However, as you correctly pointed out, LE and NEE may be interdependent, particularly given the complex interactions between surface processes and climate dynamics. We acknowledge that such interdependence could affect the accuracy of the likelihood estimation.

To better account for the potential dependencies between these variables and enhance the accuracy of our statistical inferences, we will introduce a composite likelihood method in the revised manuscript. This approach enables us to add, rather than multiply, the likelihood functions for LE and NEE, thereby accommodating their possible correlation. Additionally, we will compare the performance of the multiplicative and composite likelihood approaches in the context of parameter calibration, evaluating their respective impacts on model fit.

**Comment #9:** Then, the toolbox of DREAM in MATLAB (called DREAM package) has built-in distribution-adaptive likelihood functions, such as the generalized likelihood and universal likelihood functions: <https://doi.org/10.1016/j.jhydrol.2022.128542>. These likelihood functions let the data speak for themselves – and let the residuals determine the most appropriate form of the likelihood function. This includes treatment of heteroscedasticity, correlation and non-normality. This guarantees that the residual properties will match the likelihood assumptions – and inspire much more confidence in the posterior parameter distributions derived from the lated heat flux and NEE data. Certainly, if the authors use a Bayesian approach, as they do in this paper, they must demonstrate that their residual assumptions hold. Otherwise, the parameter estimates are not particularly meaningful.

**Response:**

Thank you for your valuable suggestions regarding the choice of likelihood function. In our current research, we initially selected the normal likelihood function due to its widespread use and computational simplicity. However, we fully acknowledge that if the residuals do not meet the normality assumption, the resulting parameter estimates may lack robustness. To improve the PEM-SMC algorithm's ability to account for the residual characteristics of complex model variables, we will revise the likelihood function by adopting the adaptive generalized likelihood or universal likelihood functions you suggested. These methods are better equipped to handle issues such as heteroscedasticity, correlation, and non-normality, ensuring that the residuals align more accurately with the likelihood assumptions.

Moreover, we plan to conduct additional experiments to assess the impact of the adaptive likelihood function on the posterior parameter distribution, ensuring that it accurately reflects the data's inherent characteristics. This approach will enhance both the reliability and robustness of parameter estimation, forming a key aspect of the study's contribution.

**Comment #10:** I do not understand why the authors use a complicated training SMC-based procedure, whereas there is relatively little they do with the knowledge of the

posterior parameter distribution. In the first place, the authors should present the Bayesian predictive distributions (time series of confidence and prediction intervals of the simulated output) in their time series figures (e.g. Figure 4). What is the coverage of the prediction limits? As it stands right now, the authors focus their attention on the MAP solutions and ignore in large part parameter uncertainty. A maximum likelihood method would have done the job. Then, stochastic gradient descent would have found the MAP solution and a first-order approximation around this optimum would have given a linear estimate of parameter uncertainty.

**Response:**

Thank you for your valuable feedback.

We recognize that assessing the model's performance deterministically using the optimal solution from the posterior distribution (e.g., the posterior median) diverges from the main objective of uncertainty analysis in the Bayesian framework. To address this, the revised manuscript will include the full Bayesian predictive distribution based on the entire posterior distribution of the parameters, along with associated confidence intervals. Additionally, we will incorporate probabilistic metrics and uncertainty evaluation methods, such as those grounded in scoring rules, to provide a more comprehensive assessment of the model's fit. This approach will not only capture historical data but also fully utilize the advantages of Bayesian probabilistic analysis, thereby improving the model's interpretability and enhancing the reliability of the results.

**Comment #11:** The authors refer to Equation 15 as the "analytical method". I am not familiar with this terminology. Equation 15 simply states that the measurement error standard deviation is equal to the square root of the sample variance of the residuals. They essentially use this as a sufficient statistic and embed this in their likelihood function. This is a common approach, but in the author's, implementation raises two important questions. A) how was the sample variance of the residuals determined? This requires knowledge of the MAP (maximum a-posteriori density) LSM parameter values, and B) the estimate of the sample variance of the residuals will be biased as the residuals are likely to exhibit serial correlation. The "true" measurement error variance can only

be determined after decorrelating this time series of MAP residuals.

**Response:**

We are not entirely sure if we have fully understood your question. Regarding the estimation of residual variance (Issue A), the  $\sigma$  we use is based on the overall residual variance between the simulated target variable values and the observed data for the current parameter  $\theta$ , rather than the variance associated with the final maximum a posteriori (MAP) estimate.  $\sigma$  is dynamically updated throughout the parameter optimization process as  $\theta$  changes. This dynamic approach allows us to better capture the characteristics of the residuals across different parameter values, rather than relying solely on the final MAP estimate.

For the issue of residual autocorrelation (Issue B), we agree that this could introduce bias in the sample variance estimation. To address this, we will incorporate autocorrelation tests, such as the Durbin-Watson or Ljung-Box tests, in the revised manuscript to assess any temporal autocorrelation in the residuals. If significant autocorrelation is detected, we will apply appropriate de-correlation methods to ensure that the estimation of the measurement error variance is accurate and unaffected by serial correlation.

**Comment #12:** The authors refer to their particle resampling step as a mutation step. This is wrong. A mutation is a random alteration to the DNA of a particle. This can happen to any parameter at any time and is fully random. The differential evolution (DE-I) step the authors use from DE-MC, DREAM or Particle DREAM) is a crossover step. The proposed changes to the DNA of the particles are based on an underlying mechanism [= Equation 18], and augmented with an inconsequential random perturbation, zeta, to claim ergodicity. This is a crossover step wherein the DNA of two parents is combined to generate offspring (candidate particles). Note that in the original DREAM algorithm, there is no mutation step – only a crossover step. Then, why did the authors not consider the use of more than 1 pair ( $r_1 - r_2$ ,  $r_3 - r_4$ ,  $r_5 - r_6$ , etc.), of differences to generate candidate points? We have shown that this enhances considerably the variability in the candidate points. Indeed, the pair  $r_1/r_2$  has a  $1/N * 1/(N-1)$  selection probability, where  $N$  significant the population size.  $r_1, r_2, \dots, r_6$

on the contrary has a selection probability, of  $1/N * 1/(N-1) * 1/(N-2)$  etc.; Thus one can generate a much large variation in the proposals with multiple pairs. The side-effect of this is that you may be able to reduce the population size.

**Response:**

We apologize for any confusion caused by our terminology. As you correctly pointed out, we inaccurately referred to the “mutation” step in our paper as a differential evolution-based operation. In fact, this process should be more accurately described as a “crossover” step. Specifically, this step involves applying the difference between two candidate particles to a third particle, which aligns with the strict definition of a crossover operation.

In the initial version of our PEM-SMC algorithm, a crossover step was indeed included, where portions of the multidimensional parameter values of particles were exchanged to increase diversity, similar to the random subspace sampling strategy used in the DREAM algorithm. However, for efficiency reasons, we removed this crossover step in the revised version of the PEM-SMC algorithm. We believe that, by choosing an appropriate number of particles  $N$  and evolution steps  $S$ , the particles can sufficiently explore the parameter space, rendering the additional crossover step unnecessary. To distinguish this from the original crossover step, we referred to the differential evolution process as a "mutation," which involves modifying the parameter values of the particles to enhance exploration.

Your suggestion of using multiple particle pairs to generate candidate points to improve acceptance rates and particle diversity is highly insightful. In our revised manuscript, we plan to rename the current “mutation” step to “crossover” and further explore the use of multiple sample pairs to generate candidate points, which could enhance both the acceptance probability and the diversity of the particles.

**Comment #13:** Do I understand correctly that after convergence you have  $N=200$  samples from the target distribution? This is very small for a 17-dimensional parameter estimation problem and does not support an accurate depiction of the posterior parameter distribution. Again, why not just use an adaptive multi-chain Monte Carlo method such as DREAM\_ZS or MT-DREAM\_ZS? This machinery will do the job for



you, while providing as byproduct a) automatic convergence monitoring (univariate and multivariate scale reduction factors, etc.), b) diagnostic checks of the residuals, c) confidence and prediction limits of the Bayesian forecast (simulation) PDF, d) scoring rules (CRPS, LS, QS, etc) of the predictive distribution and access to distribution-adaptive likelihoods.

**Response:**

Thank you for your comments and suggestions. Indeed, after convergence, we used  $N=200$  particles to represent the target distribution. However, the mention of 17 dimensions is inaccurate. In our three optimization scenarios, the parameter dimensions are 6, 5, and 6, respectively, and each was optimized separately. While we acknowledge the strong capability of the DREAM algorithm, based on the MCMC framework, in generating samples from complex distributions, Sequential Monte Carlo (SMC) is also an important framework for Bayesian parameter inference.

Our research aims to develop an algorithm, PEM-SMC, that integrates the principles of differential evolution, making it equally applicable to the optimization of complex model parameters. This algorithm is intended to provide a novel methodological option for parameter optimization, contributing to the development and application of algorithms, rather than simply applying existing methods.

You mentioned adaptive multi-chain Monte Carlo methods such as DREAM\_ZS or MT-DREAM\_ZS, which indeed offer several advantages, including automatic convergence monitoring, residual diagnostics, Bayesian prediction intervals, and the application of scoring rules.

In the Discussion of revised manuscript, we will further expand on these aspects and conduct a detailed comparison between the PEM-SMC and DREAM algorithms to evaluate their respective strengths, weaknesses, and applicable contexts. We believe this comparative analysis will help demonstrate the effectiveness of PEM-SMC in specific applications while providing more empirical evidence for its comparison with well-established methods like DREAM.

**Comment #14:** In principle, the authors have access to the predictive distribution of the model, but in their model evaluation resort only to common deterministic measures

of model performance. This includes the NSE and RMSE in Equations 19 and 20. Their use entails a large loss of information about model performance. This is just a side note: The authors should consider evaluating the full predictive distribution using scoring rules. I hesitate to advertise my own work, but here it is, Distribution-Based Model Evaluation and Diagnostics: Elicitability, Propriety, and Scoring Rules for Hydrograph Functionals: <https://doi.org/10.1029/2023WR036710>. This merely serves as a note to alert the authors against the use of deterministic measures of goodness of fit, in case one has access to the full Bayes predictive distribution. This allows for the use of information-theoretic principled metrics – which offer more protection against misinformation, disinformation, etc.

**Response:**

Thank you for your valuable feedback. We acknowledge that our current method of evaluating model performance by relying on a single optimal solution from the posterior distribution (such as the posterior median) falls short of fully addressing the central goal of uncertainty analysis within the Bayesian framework. In the revised manuscript, we will address this limitation by generating Bayesian predictive distributions and their associated credible intervals, based on the complete posterior distribution of the parameters. Furthermore, we will incorporate evaluation metrics grounded in scoring rules, such as the Continuous Ranked Probability Score (CRPS), Logarithmic Score (LS), and Quadratic Score (QS), to offer a more comprehensive assessment of the model's predictive performance. This approach will not only improve our ability to fit historical data but also fully leverage the probabilistic insights of Bayesian analysis, enhancing both the interpretability of the model and the reliability of its predictions.

**Comment #15:** Then, the authors use different sensitivity analysis methods to decide which parameters are sensitive and which ones are not. A critical assumption in this analysis is that the parameters are independent. This assumption is convenient but may not be realistic in practice. As an idea, the authors could determine sensitivity using their posterior parameter samples. This would equate to probabilistic variance-based sensitivity analysis and relies on high dimensional model presentation (HDMR), an

extension of Sobol to correlated variables. HDMR and HDMR with extended bases are computationally quite demanding, so this may pose problems with their LSM. Nevertheless, given their strong interests in computational methods I thought I'd point at the HDMR/HDMR\_EXT toolboxes, which are available in MATLAB. Alternatively, they should consider the multi-criteria sensitivity analysis method of Bastidas, in evaluating sensitivity in the presence of more than one data type. But, realistically, why not do inference on all the parameters and then assess parameter sensitivity from the posterior LSM parameter distribution(s)? One could use measures such as the Kullback Leibler divergence (= divergence of the logarithmic score, see Vrugt, 2024) to determine the distance between the marginal prior and marginal posterior distribution of each parameter. This is cheap to compute and will convey which parameters are most sensitive and which others are not. Indeed, for parameters that are sensitive one would expect its posterior marginal distribution to be small relative to its marginal prior. On the contrary, for a parameter that is insensitive it is common to see that its prior and posterior marginals are nearly equivalent. Maybe this approach simplifies the paper.

**Response:**

Thank you for your insightful suggestions. We recognize the theoretical value of your proposed sensitivity analysis method based on posterior parameter samples. However, calibrating all parameters and comparing their prior and posterior distributions would significantly increase both the computational cost and the complexity of the calibration process. In complex models, not all parameters exert a substantial influence on the simulation of target variables. Therefore, focusing on calibrating only the most influential parameters allows us to improve model accuracy while maintaining computational efficiency.

To identify these key parameters, we employed both qualitative and quantitative sensitivity analysis techniques to determine which parameters are most strongly correlated with one or more target variables, and we calibrate only those. This approach effectively balances model precision with computational efficiency, providing a fast and practical solution.

That said, your suggestion regarding variance-based sensitivity analysis is highly

valuable. In our revised manuscript, we will incorporate metrics such as Kullback-Leibler divergence (i.e., the divergence of log scores, as noted by Vrugt, 2024) to validate the key parameters identified through sensitivity analysis. By comparing the marginal prior and posterior distributions after calibration, we can further verify the accuracy of the sensitivity analysis. Nevertheless, we still believe that combining sensitivity analysis with the PEM-SMC calibration framework is the most suitable approach for our specific application.

**Comment #16:** Figure 2: The x-labels are not readable and strangely chosen. If the authors want to demonstrate that the different optimization scenarios lead to different marginal distributions of the parameters, then why not use a single x-axis, linearly-scaled, and just plot the 3 distributions on top of this. Thus the same as now but with a linear scale of the x-axis. This would show immediately the differences between the methods. Then, I have my doubts whether the marginal distribution of the parameters shown are truly Gaussian. This may be an artifact of an insufficient sample of the target distribution, as commented on earlier in 7.

**Response:**

Thank you for your valuable suggestions. In the revised manuscript, we will improve Figure 3 by using a single linear x-axis to more clearly display the differences in the marginal distributions of parameters across the various optimization scenarios. Additionally, we will include a plot showing the actual distribution of the 200 particles in the parameter space, rather than relying on a simple probability density histogram, which will provide a more accurate representation of the posterior distribution.

As for the original fitted curve, it was an initial attempt to approximate the posterior distribution of the parameters. However, we recognize that it may not fully capture the true posterior and could potentially mislead readers. To avoid any confusion, we will remove the fitted curve in the revised version.

**Comment #17:** Figure 4: Maybe this is explained in the text and I missed it but why are the observations indicated with a pink interval? Noisy observations? Personally, I would prefer plotting the data as discrete points, alternatively, one can think of averaging the data (measurements) so there are fewer data points in return and then

accompany these time-averaged estimates with error bars. As it stands right now, I see three deterministic simulations and then a wide range of possible data values. If the authors are interested in quantifying measurement uncertainty, then the nonparametric estimator of de Oliveira and Vrugt comes to mind: <https://doi.org/10.1029/2022WR032263>. Again, this is a sidenote, but it may help the authors present their data better. Maybe the authors can use this to their advantage.

**Response:**

Thank you for your suggestion. The purple shaded area was originally used to emphasize the differences between the observed data and the four simulation results, without considering observational noise. In response to your feedback, we will revise the manuscript by plotting the observational data as discrete points to enhance clarity. Furthermore, we will update Figure 4 to include Bayesian predictive distributions derived from the full posterior distribution, along with the corresponding credible intervals.

**Comment #18:** Section 4.2: This is not a difference between single and multiobjective methods. All the results correspond to a single objective, albeit with one or more weighted data streams. I commented on this before.

**Response:**

Thank you for your correction. We acknowledge that our study did not focus on multi-objective parameter calibration. In the revised manuscript, we will adjust the discussion to move away from the distinction between single-objective and multi-objective methods. Instead, we will focus on the more relevant issue of how using a single target variable versus a weighted combination of multiple variables impacts parameter calibration results and model performance in the context of complex land surface model (LSM) calibration.

**Comment #19:** Then, the authors use the terminology of optimization scenarios. Personally, I do not like the terminology of optimization in a Bayesian context. Optimization focuses on finding the single best solution whereas Bayesian inference is fundamentally different in that it wants to find a distribution of statistically acceptable solutions – this should include the MAP parameter values (= ML with uniform prior)

but cannot be considered optimization. Some authors call it Bayesian calibration, I prefer Bayesian training or estimation. I leave this to the authors.

**Response:**

Thank you for your valuable feedback. We recognize that our previous terminology did not clearly distinguish between parameter optimization and parameter inference. In response to your suggestion, we will revise the manuscript to replace the term "parameter optimization" with "parameter estimation," which more accurately aligns with the Bayesian framework.

In summary, this paper needs a lot of work before it can be judged to make a significant contribution to the literature. I am sorry for highlighting my own work, but I felt this was relevant and necessary as the authors' methodology has important flaws, shortcomings and needs to be reconsidered. Amongst others, I believe that a) the authors should properly demonstrate that their method is indeed robust and that the changes made to the PEC-SMC sampler leave the target distribution invariant, b) they must properly recognize past literature contributions, consider how their method differs from past methods, and articulate why we would need the SMC machinery after all to obtain the posterior LSM parameter distribution if current state of the arts method can do this job (and the maximum likelihood method/weighted least squares will do in the current implementation of the authors), c) test the residual properties (diagnostic checks of autocorrelation, distribution and variance homogeneity) so as to demonstrate that the assumptions of the normal likelihood function are indeed met, d) present the confidence and prediction limits of the Bayes predictive distributions, e) clean up their language of single and multiple objective, mutation and crossover step, etc. and f) possibly, consider more powerful model evaluation metrics rather than the deterministic measures used by the authors. No doubt, these comments and those listed above will involve substantial work. But this should significantly enhance the quality of the work presented in this paper.

**Response:**

Thank you for your thorough evaluation of our paper and your detailed feedback on the PEM-SMC method. We fully recognize the importance of the improvements you have

suggested. Although these revisions will require substantial effort, we are confident that they will significantly enhance both the robustness of the algorithm and the overall quality of the manuscript. We are committed to addressing each of your recommendations and look forward to your continued guidance and feedback to further improve the paper. Once again, we greatly appreciate your review and valuable suggestions.
